# Supplementary material for: Study on the Electrochemical Performance of MOF-Derived Mn2O3 Electrode Materials on Magnesium Ion Capacitors
Source: Research Square preprint supplement (doi:10.21203/rs.3.rs-8691077/v1), 2026-01-29
Supplement: Supplementary file 1 [file 4dc8e7414f07d8a6fa241e02.docx]

Supporting Information

Study on the Electrochemical Performance of MOF-Derived Mn2O3 Electrode Materials on Magnesium Ion Capacitors

Ping-Ping Suna, Yun-Heng Lia, Bo Yangb, Hai-Yan Liua*

a The Foundation of Liaoning Provincial Key Laboratory of Energy Storage and Utilization, Yingkou Institute of Technology, Yingkou 115014, China

bShenghong Refining & Chemical (Lianyungang) Co., Ltd. 2220651,China

Email addresses: liuhaiyan2025@foxmail.com (H.-Y. Liu)

**Figure List**

Figure S1 The unit cell of 26p-Mn-MOF along different view of a) a axis, b) b axis, c) c axis.

Figure S2 The unit cell of 26p-Mn-MOF along different view of a) a axis, b) b axis, c) c axis.

Figure S3 The XRD patterns of 26p-Mn-MOF

Figure S4 The morphologies of the 26p-Mn-MOF in different at different magnification levels (a) 1000 times, (b) 5000 times.

Figure S5 The morphologies of the samples after being calcined at 500℃(a-b) and 700℃ (c-d).

Figure S6 CV curves of a) Mn2O3-500 and b) Mn2O3-700.

Figure S7 Determination of the b value using the relationship between peak current and scan rate of a) Mn2O3-500 and b) Mn2O3-700.

Figure S8 a-e)The proportion of double-layer contribution and pseudo-capacitive contribution of Mn2O3-600 at different sweep rates of 10-100 mV s-1

Figure S9 a-e)The proportion of double-layer contribution and pseudo-capacitive contribution of Mn2O3-500 at different sweep rates of 10-100 mV s-1

Figure S10 a-e)The proportion of double-layer contribution and pseudo-capacitive contribution of Mn2O3-700 at different sweep rates of 10-100 mV s-1

Figure S11 Discharge time of a) Mn2O3-500 and b) Mn2O3-700 at 1-8 A g-1 current density.

Figure S12 The GCD curve of activated carbon at an current density of 1 A g-1.

**Table List**

Table S1 Reagent Information

Table S2 Crystallographic data and refinement parameters for 26p-Mn-MOF

Table S3 Selected bond lengths (Å) for the 26p-Mn-MOF.

Table S4 Selected bond angles for the 26p-Mn-MOF.

Table S5 Hydrogen Bonds for 26p-Mn-MOF.

Materials characterization

The structures of samples were analyzed by powder X-ray Diffraction (PXRD), implemented on MiniFlex600 diffractometer (40 kV, 15mA, Cu K*α λ*=0.15405nm) in a 2-theta range from 5 to 50° by continuous scanning, with a sampling interval of 0.0200°and a scanning speed of 5° min-1. The diffraction data was collected by single-crystal X-ray diffractometer on a SuperNova CCD operated at 50 kV and 0.8 mA using Mo Kɑ radiation (λ=0.071073nm) at 294 K. The specific test parameters refer to other reports .


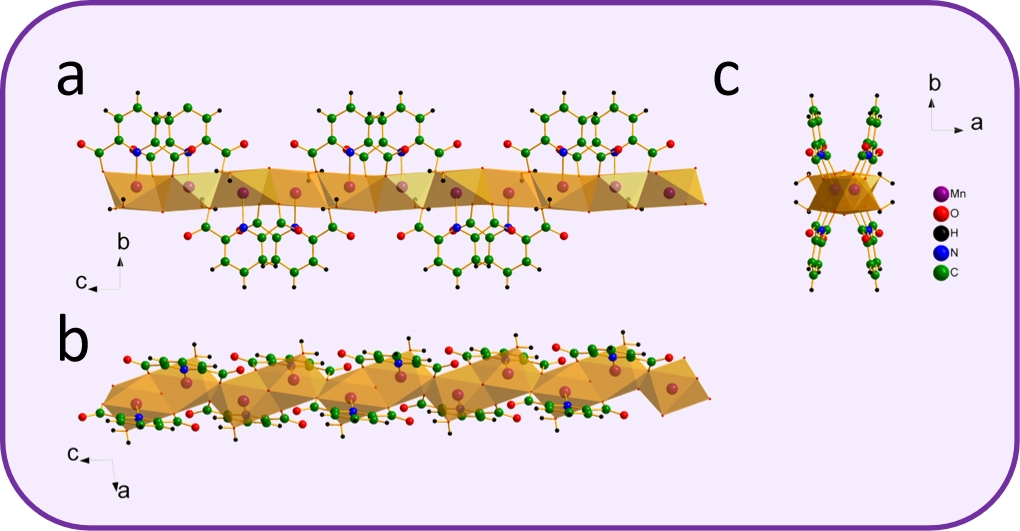


Figure S1 The unit cell of 26p-Mn-MOF along different view of a) *a* axis, b) *b* axis, c) *c* axis.


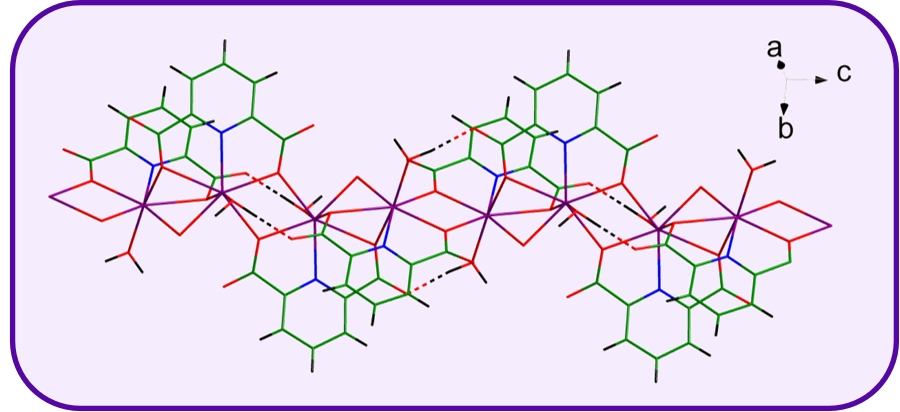


Figure S2 Wire frame view of the super cell structure of 26p-Mn-MOF, the dotted lines show H-bond.


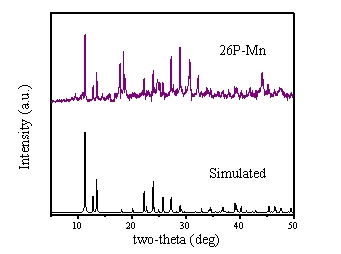


Figure S3 The XRD patterns of 26p-Mn-MOF


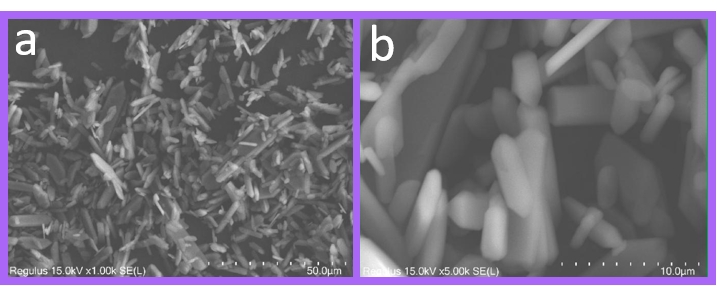


Figure S4 The morphologies of the 26p-Mn-MOF in different at different magnification levels (a) 1000 times, (b) 5000 times.


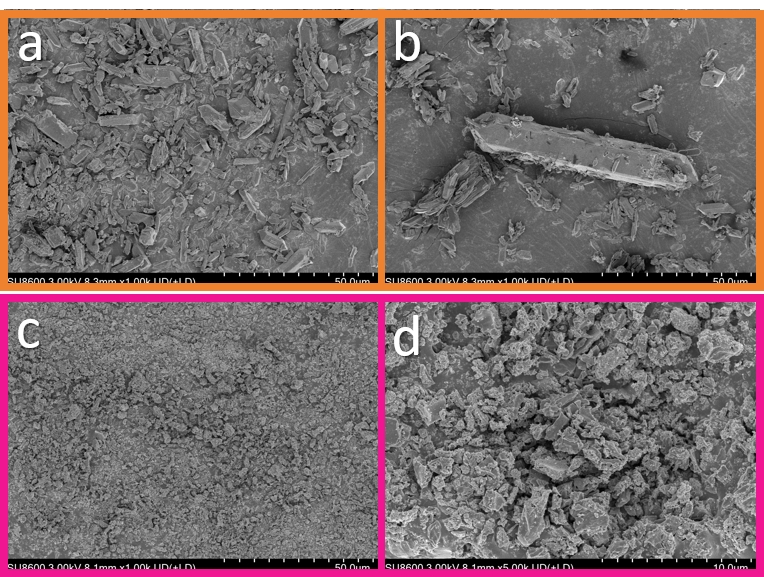


Figure S5 The morphologies of the samples after being calcined at 500℃(a-b) and 700℃ (c-d).


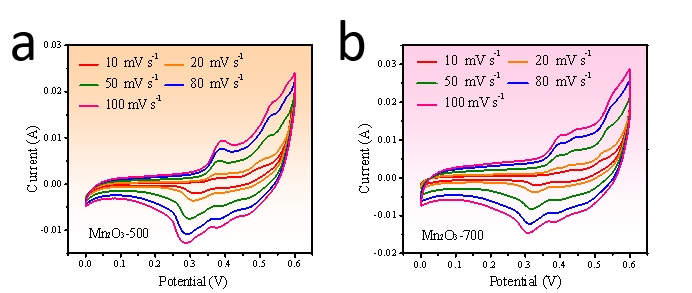


Figure S6 CV curves of a) Mn2O3-500 and b) Mn2O3-700.


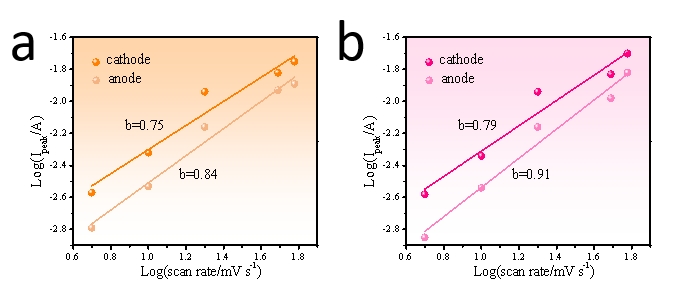


Figure S7 Determination of the b value using the relationship between peak current and scan rate of a) Mn2O3-500 and b) Mn2O3-700.


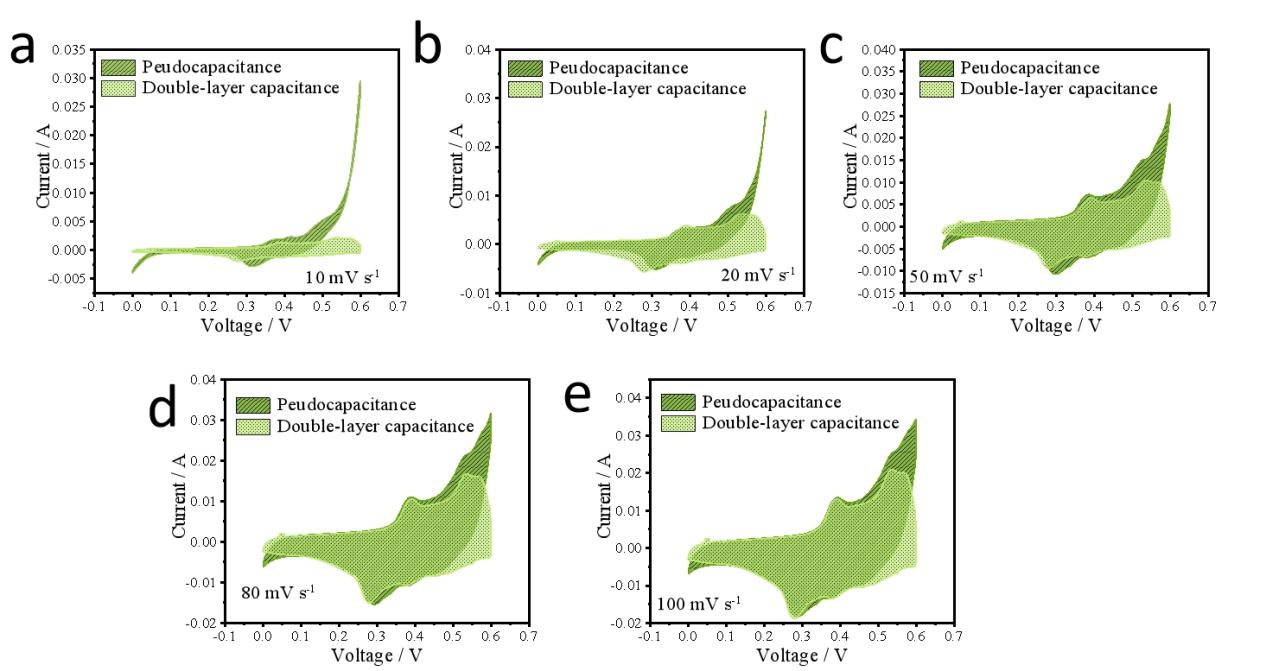


Figure S8 a-e)The proportion of double-layer contribution and pseudo-capacitive contribution of Mn2O3-600 at different sweep rates of 10-100 mV s-1


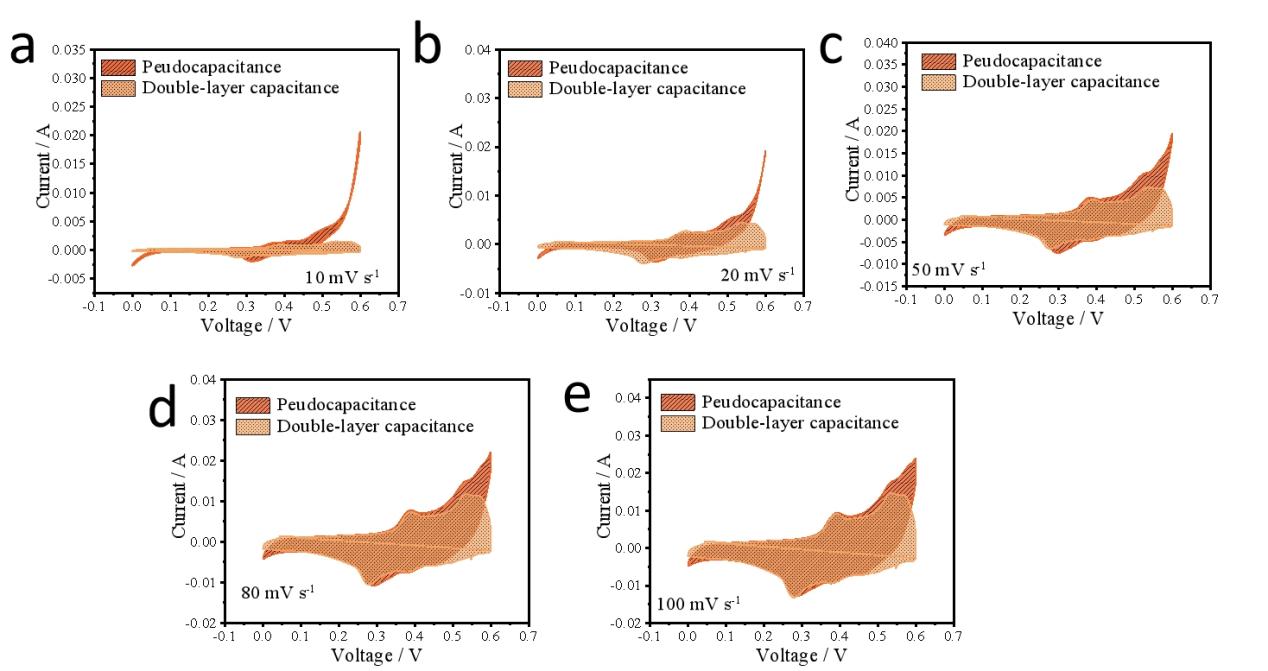


Figure S9 a-e)The proportion of double-layer contribution and pseudo-capacitive contribution of Mn2O3-500 at different sweep rates of 10-100 mV s-1


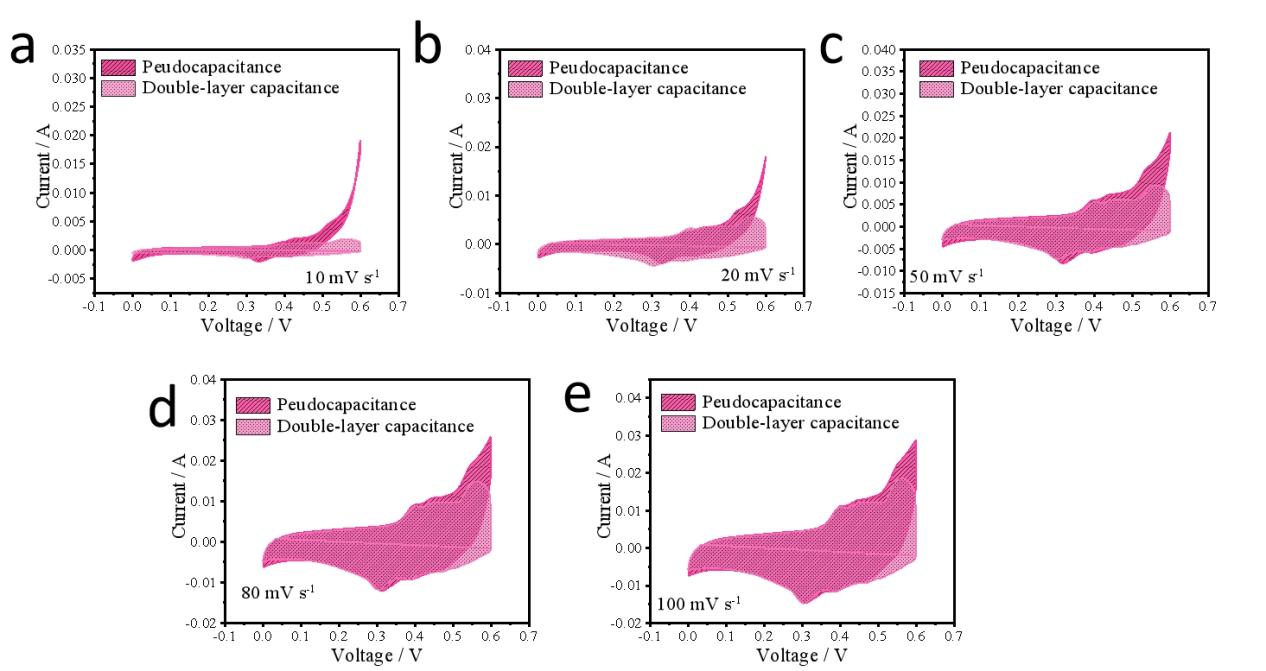


Figure S10 a-e)The proportion of double-layer contribution and pseudo-capacitive contribution of Mn2O3-700 at different sweep rates of 10-100 mV s-1


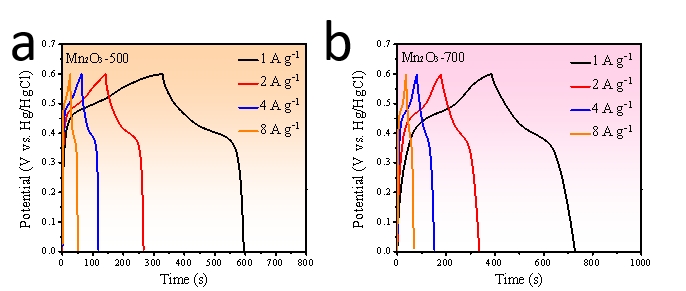


Figure S11 Discharge time of a) Mn2O3-500 and b) Mn2O3-700 at 1-8 A g-1 current density.


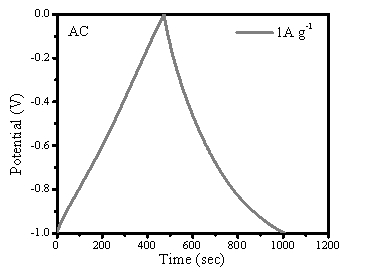


Figure S12 The GCD curve of activated carbon at an current density of 1 A g-1.

Table S1 Reagent Information

| **Name** | **Purity** | **Manufacturer** |
| --- | --- | --- |
| 2,6-Pyridine dicarboxylic acid | 99.0% | Afaisa reagent |
| Anhydrous magnesium sulfate | 99.0% | Afaisa reagent |
| Manganese acetate | 99.0% | Afaisa reagent |
| Potassium hydroxide | 99.0% | Afaisa reagent |
| Acetylene black | 99.0% | Afaisa reagent |
| Polyvinylidene fluoride (PVDF) | 99.0% | Afaisa reagent |
| N-Methylpyrrolidone (NMP) | 99.0% | Afaisa reagent |

Table S2 Crystallographic data and refinement parameters for 26p-Mn-MOF

| parameters | values |
| --- | --- |
| Empirical formula | C14H10Mn2N2O11 |
| Formula weight | 500.1 |
| Temperature/K | 293(2) |
| Crystal system | monoclinic |
| Space group | C2/c |
| a/Å | 13.1954(10) |
| b/Å | 9.7333(6) |
| c/Å | 13.1363(9) |
| α/° | 90 |
| β/° | 96.144(7) |
| γ/° | 90 |
| Volume/Å3 | 1677.5(2) |
| Z | 4 |
| Densityg/cm3 | 1.984 |
| μ/mm‑1 | 1.615 |
| F(000) | 1001.0 |
| 2Θ range for data collection/° | 7.872 to 65.072 |
| Index ranges | -19 ≤ h ≤ 19, -14 ≤ k ≤ 14, -18 ≤ l ≤ 18 |
| Reflections collected | 8232 |
| Independent reflections | 2816 [Rint = 0.0581, Rsigma = 0.0795] |
| Data/restraints/parameters | 2816/0/130 |
| Goodness-of-fit on F2 | 0.975 |
| Final R indexes [I>=2σ (I)] | R1 = 0.0590, wR2 = 0.1493 |
| Final R indexes [all data] | R1 = 0.0867, wR2 = 0.1776 |
| CCDC number | 2106211 |

Table S3 Selected bond lengths (Å) for the 26p-Mn-MOF.

|  | Bond length |  | Bond length |
| --- | --- | --- | --- |
| Mn1-O21 | 2.268(2) | Mn1-O6 | 2.492(2) |
| Mn1-O22 | 2.256(2) | Mn1-O41 | 2.125(3) |
| Mn1-O4 | 2.167(2) | Mn1-N1 | 2.289(3) |
| Mn1-O3 | 2.274(2) |  |  |

Symmetric code:11-X,+Y,3/2-Z; 2+X,1-Y,1/2+Z;

Table S4 Selected bond angles for the 26p-Mn-MOF.

|  | Angle/˚ |  | Angle/˚ |
| --- | --- | --- | --- |
| O21-Mn1-O22 | 70.82(9) | O4-Mn1-O42 | 78.99(9) |
| O21-Mn1-O42 | 150.95(8) | O4-Mn1-N12 | 90.73(10) |
| O22-Mn1-O42 | 136.90(8) | O4-Mn1-O3 | 74.03(8) |
| O21-Mn1-N12 | 140.54(8) | O6-Mn1-O22 | 88.63(10) |
| O22-Mn1-N12 | 70.78(8) | O6-Mn1-O21 | 83.55(10) |
| O21-Mn1-O22 | 83.43(7) | O6-Mn1-O4 | 164.31(10) |
| O22-Mn1-O3 | 154.03(7) | O6-Mn1-O42 | 102.51(9) |
| O4-Mn1-O21 | 87.89(10) | O6-Mn1-N12 | 104.23(11) |
| O4-Mn1-O22 | 100.97(9) | O6-Mn1-O3 | 91.89(10) |
| N12-Mn1-O42 | 66.14(8) | O3-Mn1-O42 | 68.12(7) |
| O3-Mn1-N12 | 133.73(8) |  |  |

Symmetric code:11-X,+Y,3/2-Z; 2+X,1-Y,1/2+Z;

Table S5 Hydrogen Bonds for 26p-Mn-MOF.

| D H A | d(D-H)/Å | d(H-A)/Å | d(D-A)/Å | D-H-A/° |
| --- | --- | --- | --- | --- |
| O6 H6A O51 | 0.95 | 2.12 | 2.725(4) | 120.4 |
| O6 H6B O52 | 0.95 | 1.85 | 2.789(3) | 170.2 |

Symmetric code:11-X,+Y,3/2-Z; 2+X,1-Y,1/2+Z;

Table S6 Specific fitting values of EIS.

| Sample | Rs | Rct |
| --- | --- | --- |
| Mn2O3-500 | 0.93Ω | 2.32 |
| Mn2O3-600 | 0.48 | 0.56 |
| Mn2O3-700 | 1.09 | 1.98 |
